# Supplementary material for: Brief communication: Visualizing uncertainties in landslide susceptibility modelling using bivariate mapping
Source: Copernicus journal article supplement (doi:10.5194/nhess-25-1425-2025), 2025-04-14
Supplement: Supplementary file 1 [file nhess-25-1425-2025-supplement.zip]

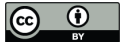

## *Supplement of*

# **Brief communication: Visualizing uncertainties in landslide susceptibility modelling using bivariate mapping**

**Matthias Schlögl et al.**

*Correspondence to:* Matthias Schlögl (matthias.schloegl@boku.ac.at)

- nhess-25-1425-2025-supplement-title-page.pdf
- rayshader.html
- rayshader\_files
  - CanvasMatrix4-1.3.1
    - \* CanvasMatrix.src.js
  - htmltools-fill-0.5.8.1
    - \* fill.css
  - htmlwidgets-1.6.4
    - \* htmlwidgets.js
  - rglWebGL-binding-1.3.1
    - \* rglWebGL.js
  - rglwidgetClass-1.3.1
    - \* animation.src.js
    - \* axes.src.js
    - \* buffer.src.js
    - \* controls.src.js
    - \* draw.src.js
    - \* init.src.js
    - \* mouse.src.js
    - \* pieces.src.js
    - \* pretty.src.js
    - \* projection.src.js
    - \* rgl.css
    - \* rglClass.src.js
    - \* rglTimer.src.js
    - \* selection.src.js

- \* shaders.src.js
- \* shadersrc.src.js
- \* subscenes.src.js
- \* textures.src.js
- \* utils.src.js

The copyright of individual parts of the supplement might differ from the article licence.
